# Supplementary material
Source: publisher site journal article supplement (https://www.dovepress.com/article/463477)
Supplement: Supplementary file 1 [file get_supplementary_file.php]

**Supplementary information for**

**Ischemic-preconditioning induced serum exosomal miR-133a-3p improved post-myocardial infarction repair via targeting LTBP1 and PPP2CA**

Na Yang1,2*, Yong-Bo Hou2,3*, Tian-Hao Cui2, Jun-Ma Yu2, Shu-Fang He4,5†, Hai-Juan Zhu1†

*These authors contributed equally to this work

1. Department of Anesthesiology, Maternal and Child Medical Center of Anhui Medical University, Hefei, Anhui, China
2. Department of Anesthesiology, The Third Affiliated Hospital of Anhui Medical University (The First People’s Hospital of Hefei), Hefei, Anhui, China
3. Department of Anesthesiology, Wannan Medical College, Wuhu, Anhui, China
4. Department of Anesthesiology and Perioperative Medicine, The Second Affiliated Hospital of Anhui Medical University, Hefei, China
5. Key Laboratory of Anesthesiology and Perioperative Medicine of Anhui Higher Education Institutes, Anhui Medical University, Hefei, Anhui, China

†**Correspondence:** Shu-Fang He and Hai-Juan Zhu are the co-corresponding authors.

Shu-Fang He, Email: sfhe@ahmu.edu.cn

Hai-Juan Zhu, Email: 35880762@qq.com

**Supplemental figures**

**
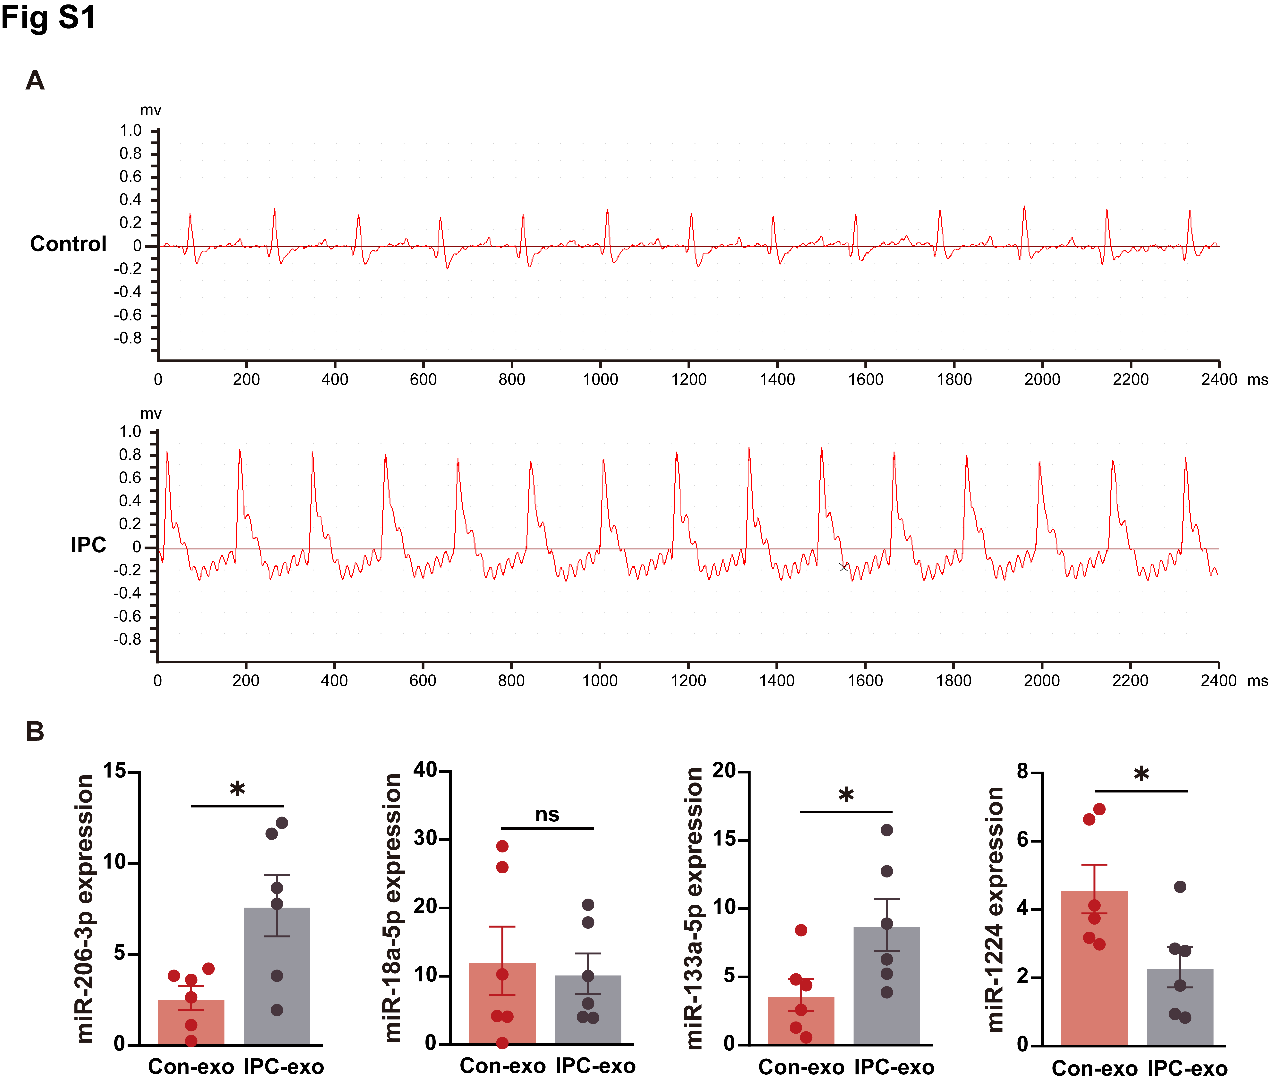
**

**Supplementary Fig S1:** Establishment of IPC rat model and the analysis of miRs in Con-exo and IPC-exo. (A) Electrocardiograms of IPC or control rats were recorded using the BL-420S biological signal acquisition and processing system. (B) Different miRs expression levels between IPC-exo and Con-exo (n=6). IPC: ischemic preconditioning; IPC-exo, exosomes isolated from IPC rat serum; Con-exo, exosomes isolated from control rat serum; miR, microRNA. 🞸*p*<0.05, and ns*p*>0.05. Data are presented as the mean ± SEM.


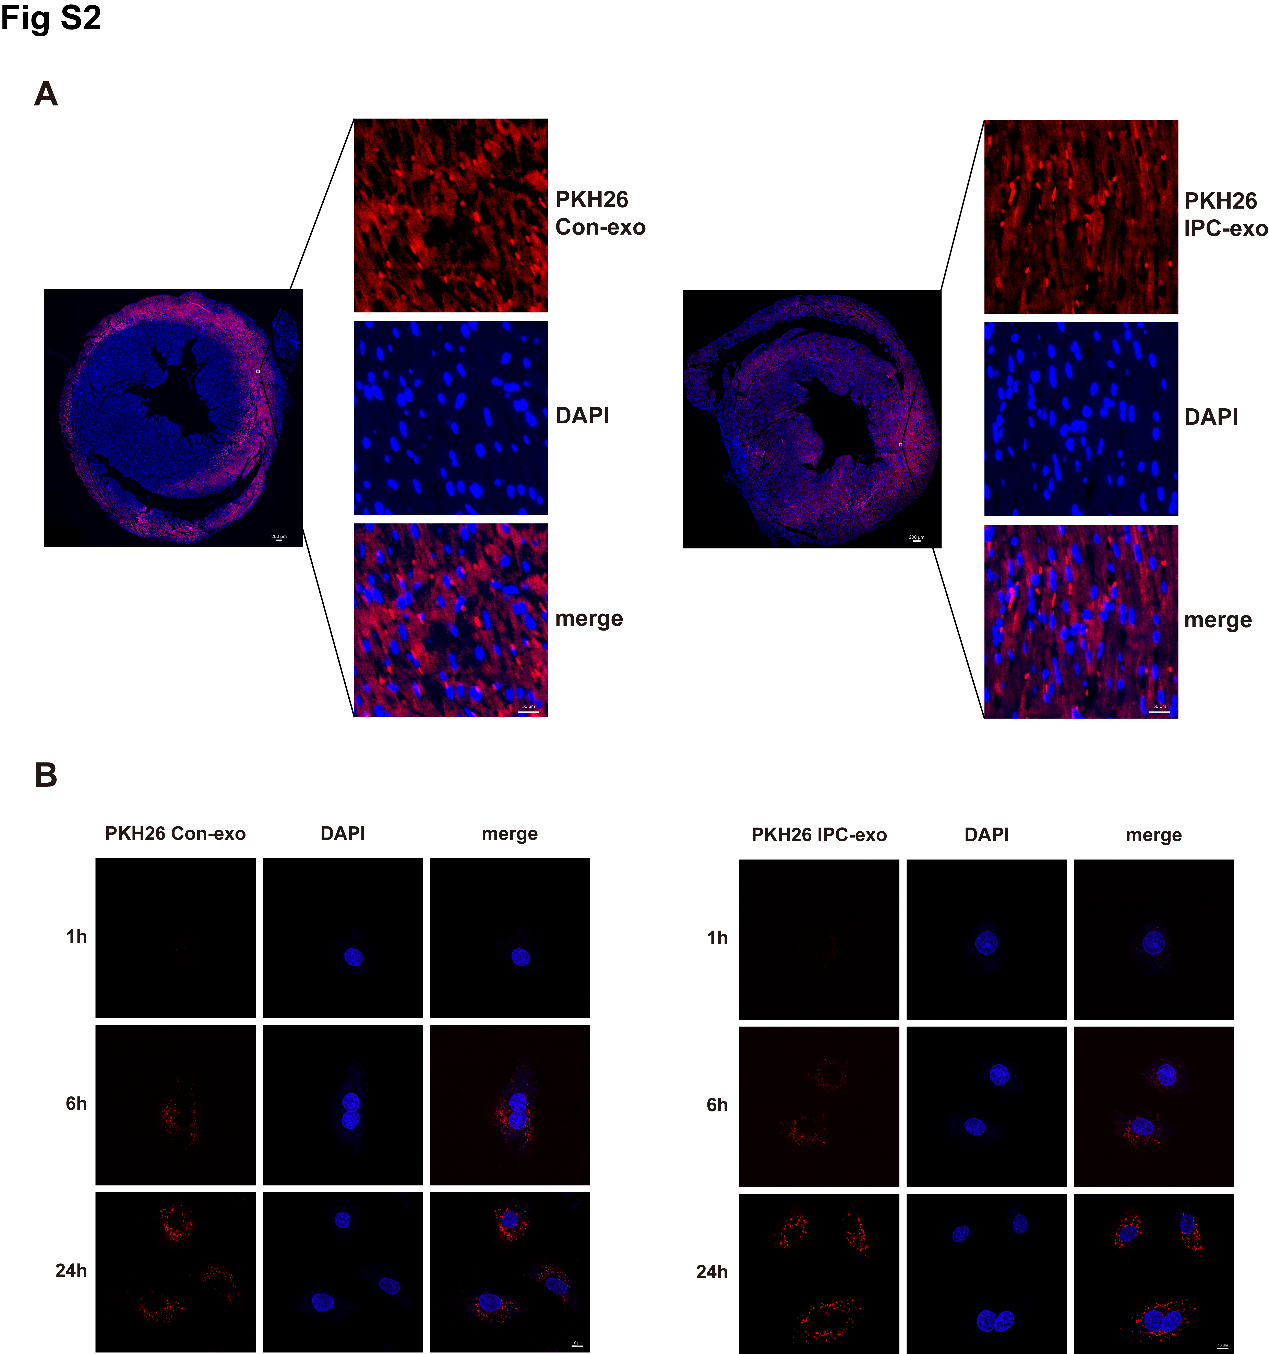


**Supplementary Fig S2:** Serum exosomes could be absorbed by cardiomyocytes and H9c2 cells. (A) Representative images of heart tissue that were intracardially injected with PKH26-labeled Control or IPC exosomes (red). The nuclei of cardiomyocytes were stained with DAPI (blue). Scale bar: 200 µm or 50 µm. (B) Representative images of H9c2 cells that were incubated with PKH-26-labeled Control or IPC exosomes (red) for 1h, 6h, and 24h, respectively. H9c2 cell nuclei were stained with DAPI (blue). Scale bar: 10 µm. IPC, ischemic preconditioning; IPC-exo, exosomes isolated from IPC rat serum; Con-exo, exosomes isolated from control rat serum; DAPI, 4’,6-diamidino-2-phenylindole.


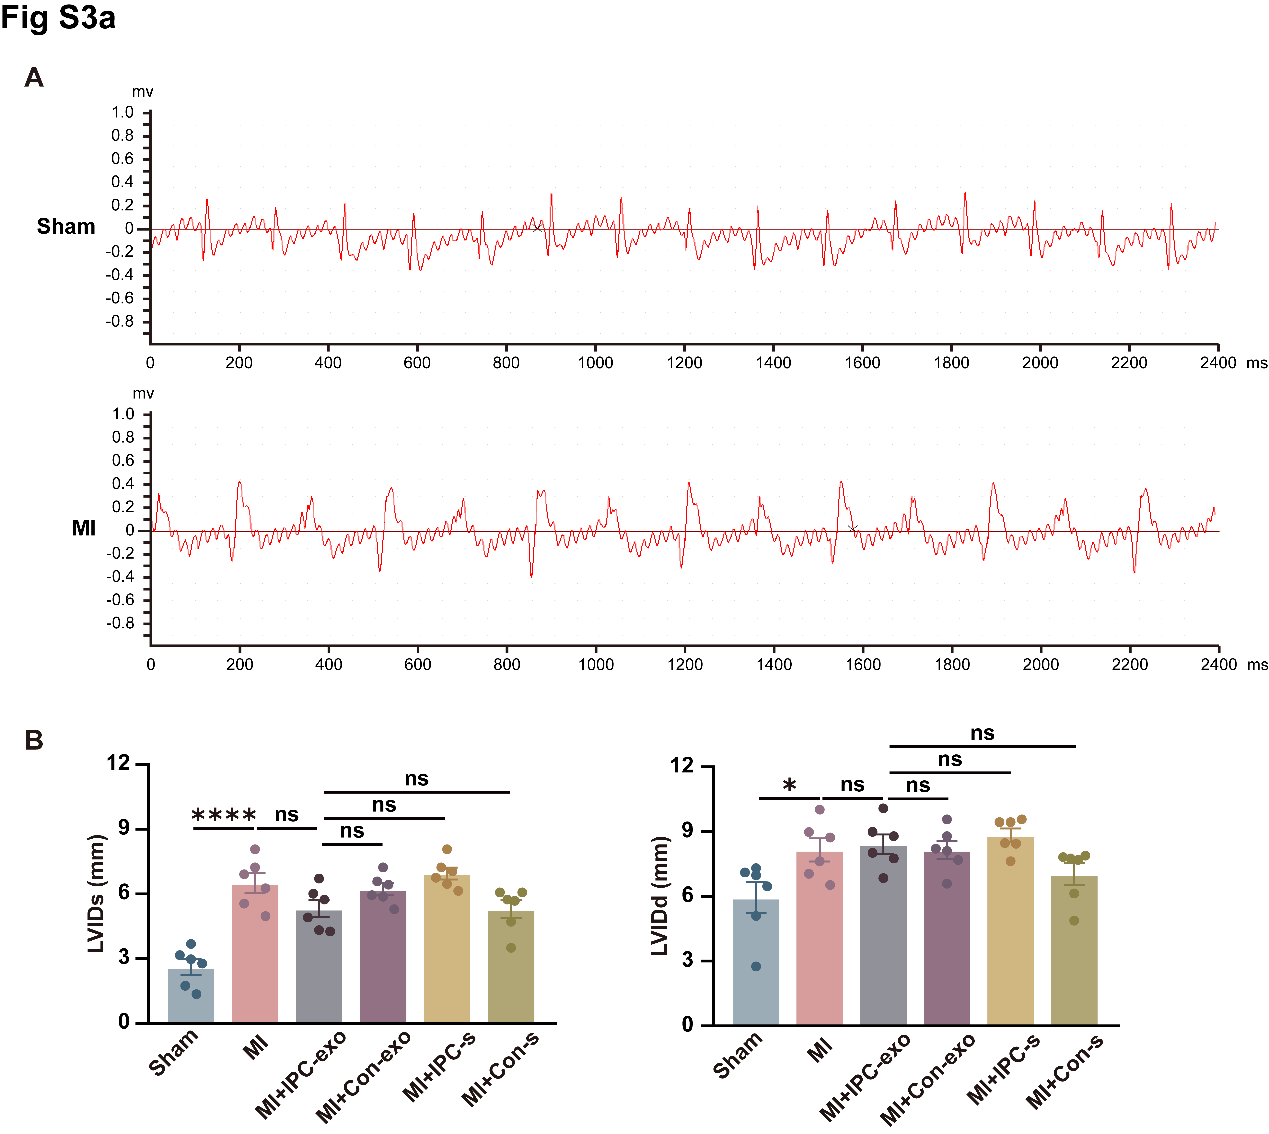


**Supplementary Fig S3a:** The effect of IPC-exo in MI rats. (A) Electrocardiograms of MI or Sham rats were recorded using the BL-420S biological signal acquisition and processing system. (B) Left ventricular internal diameter at end systole (LVIDs) and left ventricular internal diameter at end diastole (LVIDd) of rats in each group (n=6). IPC, ischemic preconditioning; IPC-exo, exosomes isolated from IPC rat serum; Con-exo, exosomes isolated from control rat serum; MI, myocardial infarction; Con-s, free-exosomes serum from control rats; IPC-s, free-exosomes serum from IPC rats. 🞸*p*<0.05, 🞸🞸🞸🞸*p*<0.0001 and ns*p*>0.05. Data are presented as the mean ± SEM.


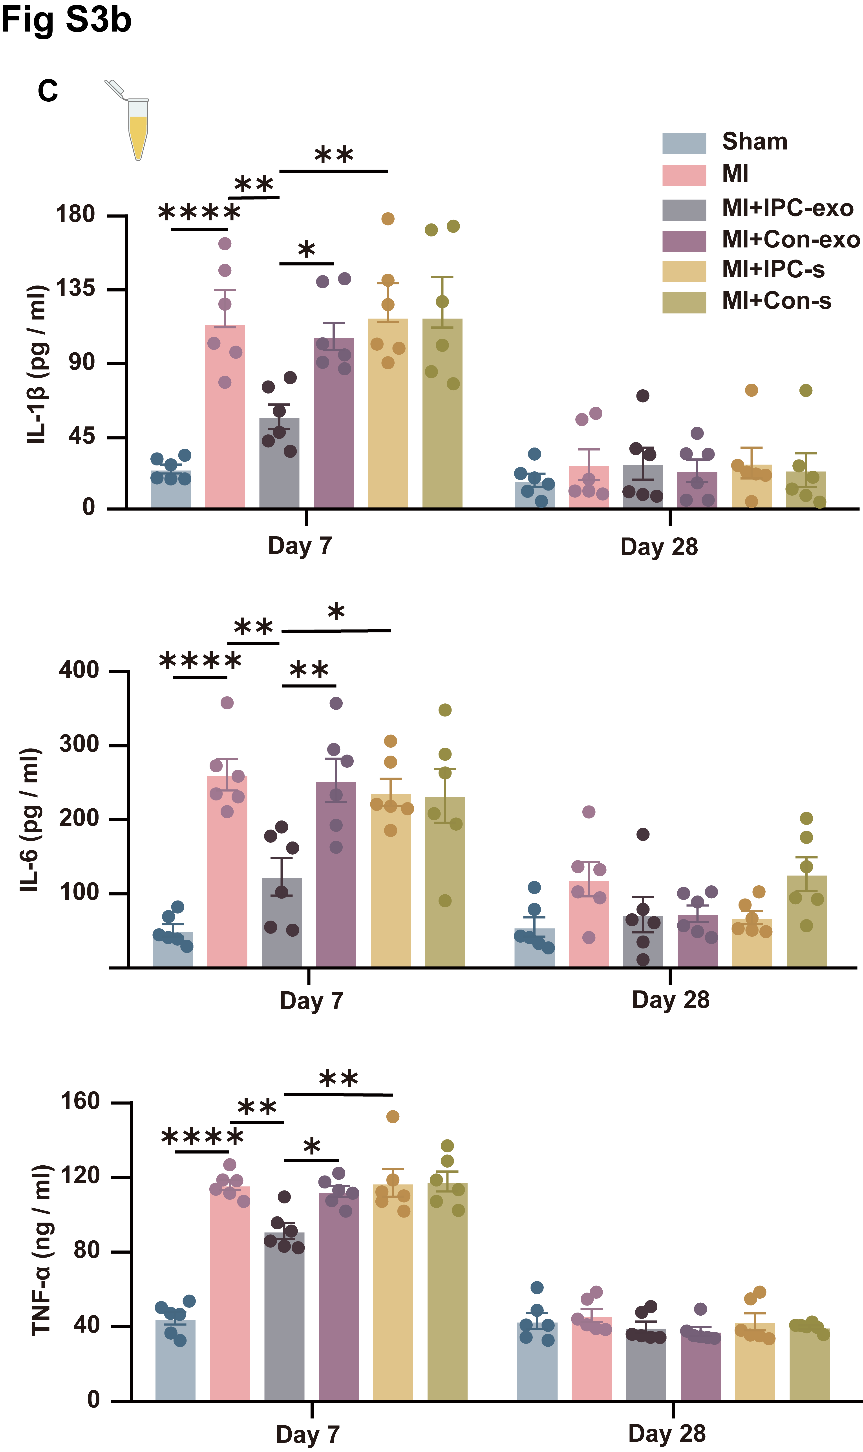


**Supplementary Fig S3b:** The effect of IPC-exo in MI rats. (C) The serum level of tumor necrosis factor-alpha (TNF-α), interleukin- (IL-) 1β, and IL-6 in the rat (n=6). IPC, ischemic preconditioning; IPC-exo, exosomes isolated from IPC rat serum; Con-exo, exosomes isolated from control rat serum; MI, myocardial infarction; Con-s, free-exosomes serum from control rats; IPC-s, free-exosomes serum from IPC rats. 🞸*p*<0.05, 🞸🞸*p*<0.01, and 🞸🞸🞸🞸*p*<0.0001. Data are presented as the mean ± SEM.


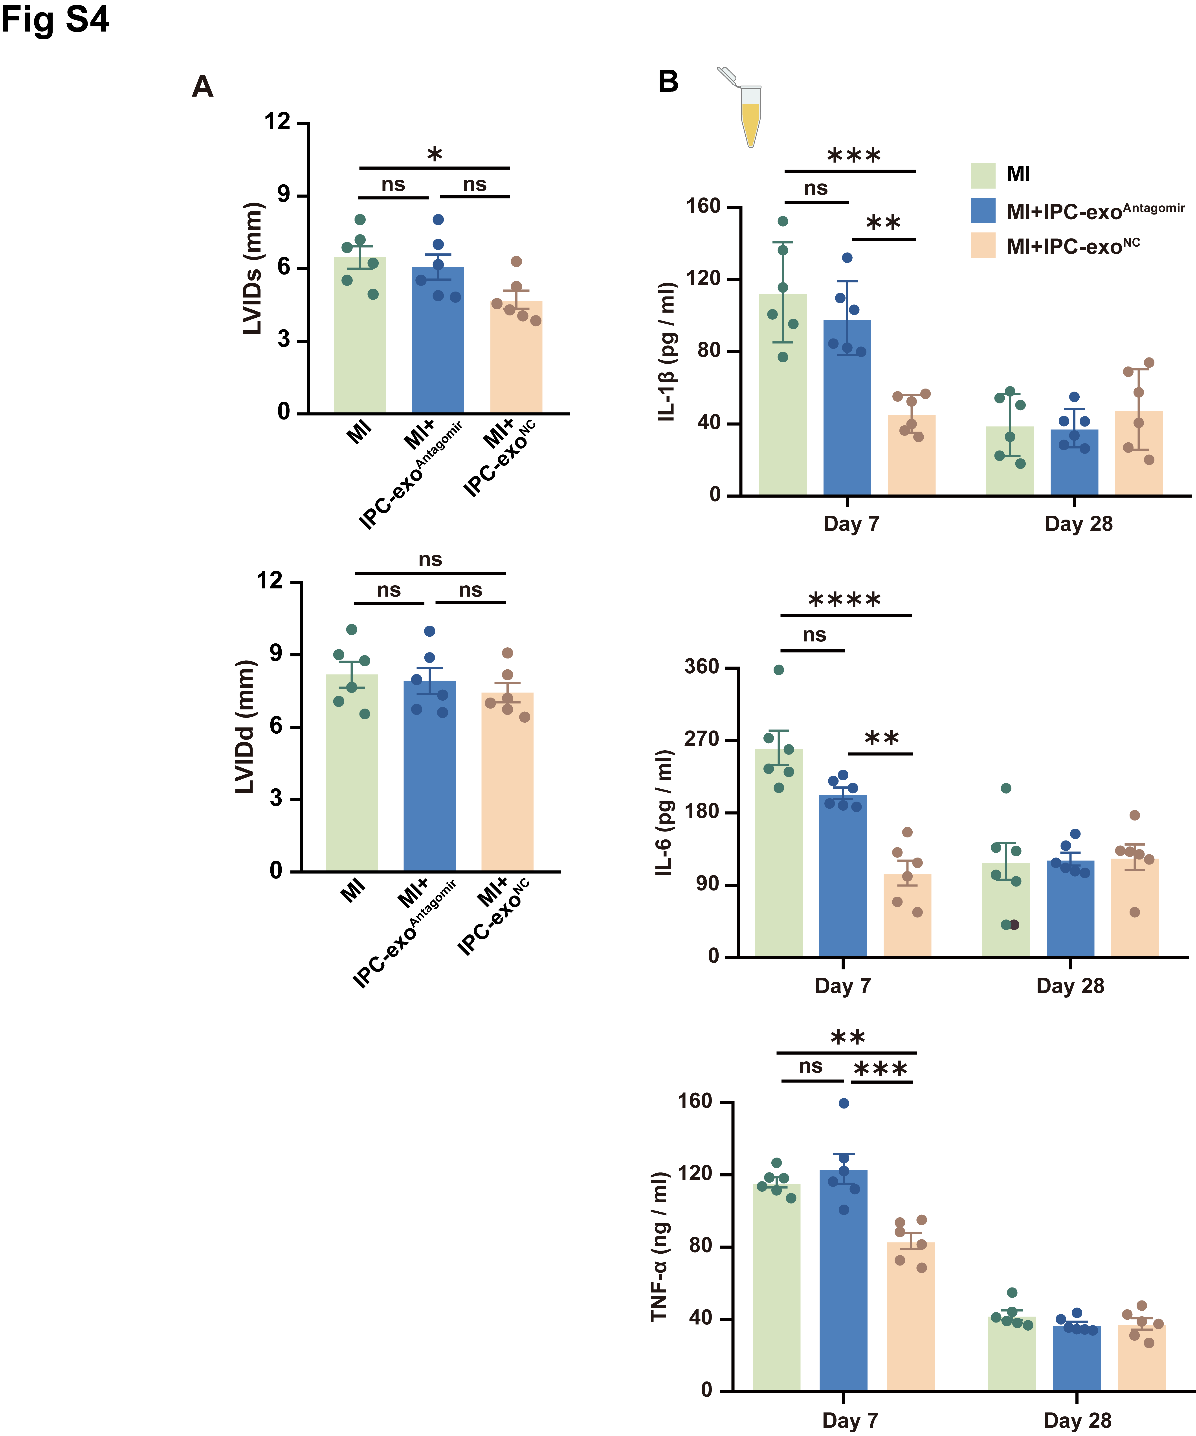


**Supplementary Fig S4:** The impact of exosomal miR-133a-3p on cardiac function and pro-inflammatory factors. (A) Left ventricular internal diameter at end systole (LVIDs) and left ventricular internal diameter at end diastole (LVIDd) of rats in each group (n=6). (B) Exosomal miR-133a-3p regulates the serum level of tumor necrosis factor-alpha (TNF-α), interleukin- (IL-) 1β, and IL-6 in the rat (n=6). MI, myocardial infarction; IPC-exo, ischemic preconditioning-induced serum exosomes; MI+IPC-exoAntagomir, MI rat injected with miR-133a-3p antagomir transfected IPC-exo; MI+IPC-exoNC, MI rat injected with miR-133a-3p antagomir NC transfected IPC-exo. 🞸*p*<0.05, 🞸🞸*p*<0.01, 🞸🞸🞸*p*<0.001, 🞸🞸🞸🞸*p*<0.0001 and ns*p*>0.05. Data are presented as the mean ± SEM.

**Supplemental tables**

**Supplementary Table 1: Sequences of microRNA and messenger RNA.**

| miR-133a-3p | Forward | 5’ tttggtccccttcaaccagctg 3’ |
| --- | --- | --- |
| LTBP1 | Forward | 5’ gggactctcccagcagatac 3’ |
| Reverse | 5’ gctctccagagaccaccttt 3’ |
| PPP2CA | Forward | 5’ tgccatgaccggaatgtagt 3’ |
| Reverse | 5’ gctggatcgaactgcaagaa 3’ |
| TGF-beta 1 | Forward | 5’ ggctaccatgccaacttctg 3’ |
| Reverse | 5’ cgtagtagacgatgggcagt 3’ |
| TGF-beta 2 | Forward | 5’ tgcactactgtgtgctgaga 3’ |
| Reverse | 5’ tgcaggtagacagactgagc 3’ |
| GAPDH | Forward | 5’ gacatgccgcctggagaaac 3’ |
| Reverse | 5’ agcccaggatgccctttagt 3’ |

Note: U6 was provided in miRNA First Strand cDNA Synthesis Kit (Tailing Reaction).

**Supplementary Table 2: Primary antibodies in western blot assay.**

| Primary antibody | Catalog Number | Source |
| --- | --- | --- |
| α-SMA | #14968 | Cell Signaling |
| CTGF | SAB5700677 | Sigma |
| Bax | 50599-2-Ig | Proteintch |
| Bcl-2 | 196495 | Abcam |
| LTBP1 | Ab78294 | Abcam |
| PPP2CA | 13482-1-AP | Proteintch |
| TGF-beta 1 | Ab215715 | Abcam |
| TGF-beta 2 | A3640 | ABclonal |
| GAPDH | 60004-1-Ig | Proteintch |
| CD9 | #98327 | Cell Signaling |
| CD63 | #PA5-92370 | Invitrogen |
| HSP70 | #4872 | Cell Signaling |
